# Supplementary material for: Secretion of Sphinganine by Drug-Induced Cancer Cells and Modified Mimetic Sphinganine (MMS) as c-Src Kinase Inhibitor
Source: PubMed Central journal article supplement — Asian Pac J Cancer Prev. 2024;25(2):433–46. doi: 10.31557/APJCP.2024.25.2.433 (PMC11077104; doi:10.31557/apjcp.2024.25.2.433), 2024
Supplement: APJCP-25-433-s001.pdf [file APJCP-25-433-s001.pdf]

Supplementary Materials:

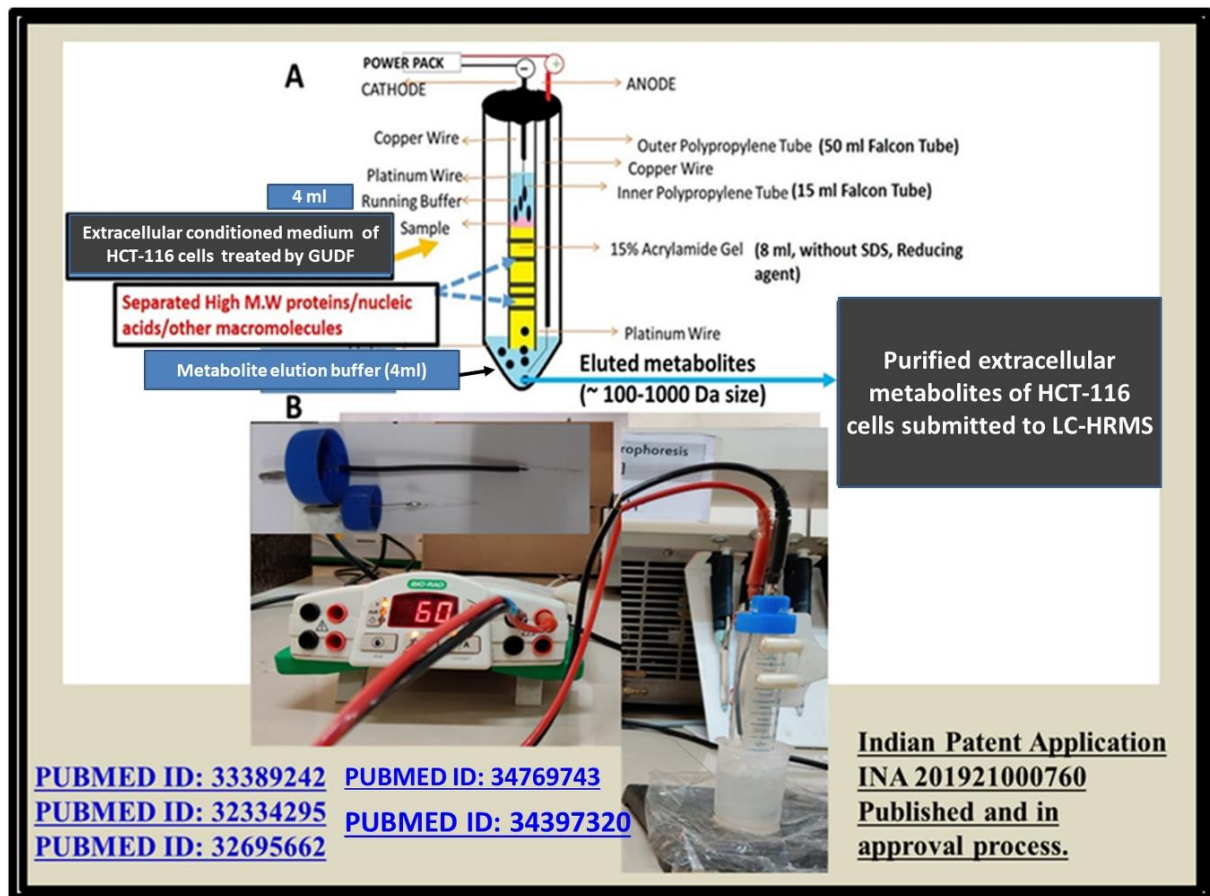

Figure S1. A flow and working model of VTGE.

| Compound Label          | Name            | m/z      | RT   | Algorithm  | Mass     |
|-------------------------|-----------------|----------|------|------------|----------|
| Cpd 24: C16 Sphinganine | C16 Sphinganine | 274.2745 | 9.65 | Auto MS/MS | 273.2669 |

MS Spectrum

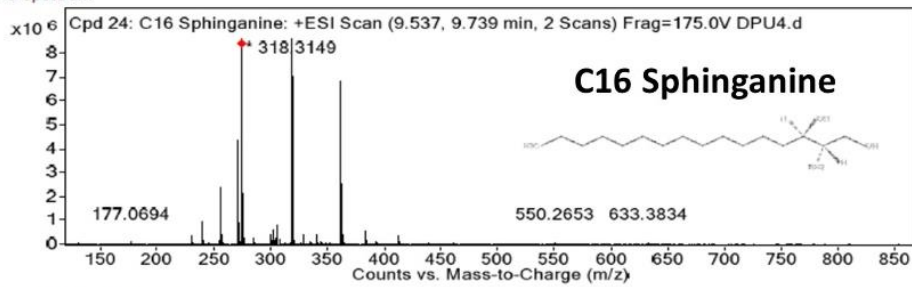

MS Spectrum Peak List

| m/z      | Calc m/z | Diff(ppm) | z | Abund      | Formula      | Ion    |
|----------|----------|-----------|---|------------|--------------|--------|
| 256.263  |          |           | 1 | 2355210.25 |              |        |
| 271.2739 |          |           | 1 | 4331907.5  |              |        |
| 274.2745 | 274.2741 | -1.72     | 1 | 8575711    | C16 H35 N O2 | (M+H)+ |
| 275.2762 | 275.2774 | 4.02      | 1 | 2140027.25 | C16 H35 N O2 | (M+H)+ |
| 276.2794 | 276.2802 | 2.69      | 1 | 208381.69  | C16 H35 N O2 | (M+H)+ |
| 318.3149 |          |           |   | 9226583    |              |        |
| 319.3061 |          |           | 1 | 7002581    |              |        |
| 320.3053 |          |           | 1 | 1470348.88 |              |        |
| 362.3287 |          |           | 1 | 6824550    |              |        |
| 363.3286 |          |           | 1 | 2502715.5  |              |        |

MSMS Spectrum

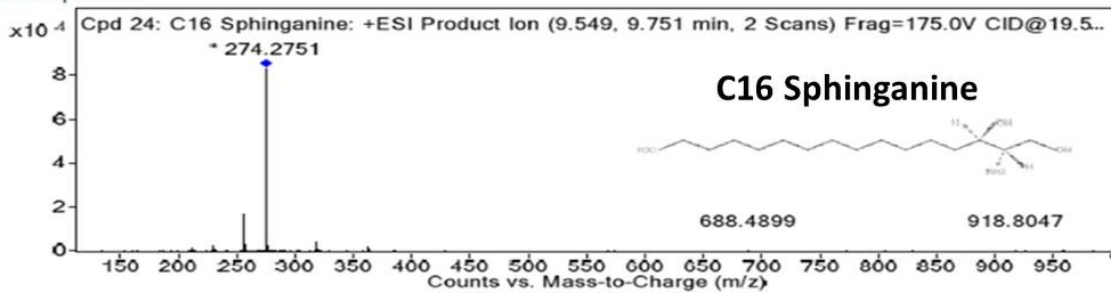

**Figure S2.** C16 sphinganine, a form of sphingolipid base is secreted in the extracellular conditioned medium of HCT-116 colon cancer cells treated by GUDF. Positive mode ESI MS and MS/MS fragment ion spectra of C16 sphinganine in GUDF treated HCT-116 cancer cells.

| Compound Label           | Name             | <i>m/z</i> | RT    | Algorithm  | Mass     |
|--------------------------|------------------|------------|-------|------------|----------|
| Cpd 33: Phytosphingosine | Phytosphingosine | 318.3003   | 9.995 | Auto MS/MS | 317.2929 |

MS Spectrum

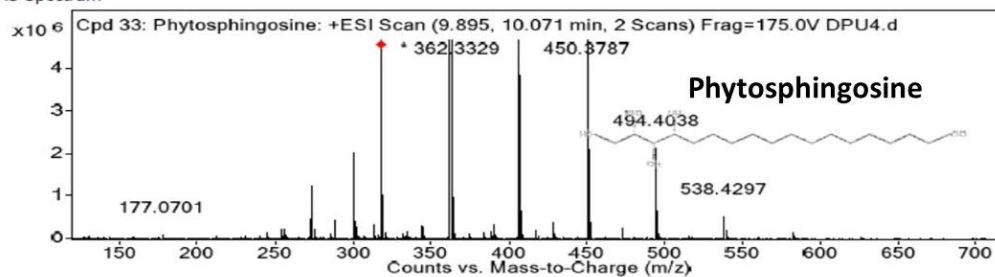

MS Spectrum Peak List

| <i>m/z</i> | Calc <i>m/z</i> | Diff(ppm) | z | Abund      | Formula      | Ion                |
|------------|-----------------|-----------|---|------------|--------------|--------------------|
| 318.3003   | 318.3003        | -0.06     | 1 | 4660630.5  | C18 H39 N O3 | (M+H) <sup>+</sup> |
| 319.3029   | 319.3036        | 2.1       | 1 | 1001724.81 | C18 H39 N O3 | (M+H) <sup>+</sup> |
| 320.3057   | 320.3063        | 2.1       | 1 | 119220.59  | C18 H39 N O3 | (M+H) <sup>+</sup> |
| 362.3329   |                 |           | 1 | 11748284   |              |                    |
| 363.3305   |                 |           | 1 | 5763947    |              |                    |
| 406.3557   |                 |           | 1 | 9796752    |              |                    |
| 407.3553   |                 |           | 1 | 3817120    |              |                    |
| 450.3787   |                 |           | 1 | 7390197    |              |                    |
| 451.3808   |                 |           | 1 | 2094961.75 |              |                    |
| 494.4038   |                 |           | 1 | 2121758.5  |              |                    |

MSMS Spectrum

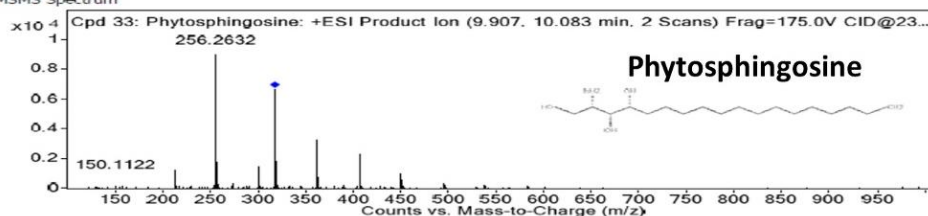

**Figure S3.** Phytosphingosine, a form of sphingolipid base is detected in the extracellular conditioned medium of HCT-116 colon cancer cells treated by GUDF. Positive mode ESI MS and MS/MS fragment ion spectra of C16 phytosphingosine in GUDF treated HCT-116 cancer cells.

| Compound Label          | Name                   | m/z      | RT     | Algorithm  | Mass     |
|-------------------------|------------------------|----------|--------|------------|----------|
| Cpd 86: Cer(d18:1/14:0) | <b>Cer(d18:1/14:0)</b> | 510.4845 | 19.819 | Auto MS/MS | 509.4777 |

MS Spectrum

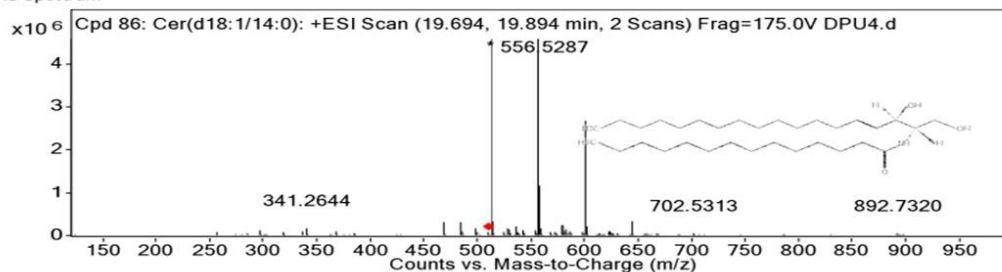

MS Spectrum Peak List

| m/z      | Calc m/z | Diff(ppm) | z | Abund      | Formula      | Ion    |
|----------|----------|-----------|---|------------|--------------|--------|
| 510.4845 | 510.4881 | 7.05      | 1 | 75532.67   | C32 H63 N O3 | (M+H)+ |
| 511.4899 | 511.4914 | 3.06      | 1 | 25725.7    | C32 H63 N O3 | (M+H)+ |
| 512.5014 |          |           | 1 | 4581715    |              |        |
| 513.5038 |          |           | 1 | 1755403.5  |              |        |
| 514.5073 |          |           | 1 | 327301.81  |              |        |
| 556.5287 |          |           | 1 | 11498224   |              |        |
| 557.53   |          |           | 1 | 5588620    |              |        |
| 558.5326 |          |           | 1 | 1150085.25 |              |        |
| 600.5519 |          |           | 1 | 2676864.5  |              |        |
| 601.5553 |          |           | 1 | 1079436.5  |              |        |

MSMS Spectrum

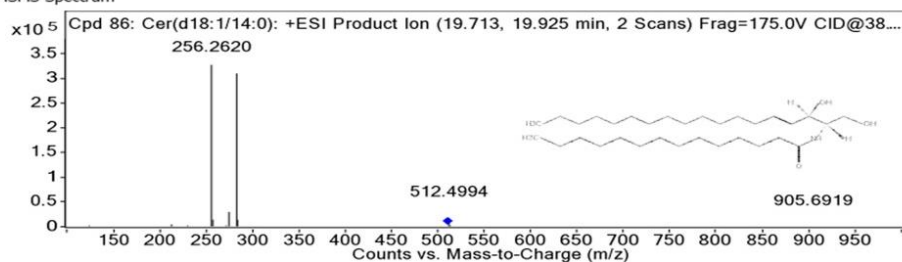

**Figure S4.** Ceramide (d18:1/14:0), a form of sphingolipid base is detected in the extracellular conditioned medium of HCT-116 colon cancer cells treated by GUDF.

Positive mode ESI MS and MS/MS fragment ion spectra of Ceramide (d18:1/14:0) in GUDF treated HCT-116 cancer cells.

### A Sphinganine

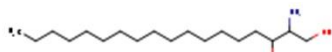

| Query | Liver Toxicity |           | Metabolism         |     |     |     |     |      | Membrane Transporters |            |           | Others     |     |      |             |       |
|-------|----------------|-----------|--------------------|-----|-----|-----|-----|------|-----------------------|------------|-----------|------------|-----|------|-------------|-------|
|       | DILI           | Cytotoxic | Cyp Inhibitors for |     |     |     |     |      | BBB                   | P-gp Inhib | P-gp Subs | hERG Block | MMP | AMES | MRTD (mg/c) |       |
|       |                |           | HLM                | 1A2 | 3A4 | 2D6 | 2C9 | 2C19 |                       |            |           |            |     |      |             |       |
| →     | No             | Yes       | Yes                | No  | No  | Yes | No  | No   | Yes                   | No         | No        | No         | No  | No   | No          | 37951 |

### B Sphingosine

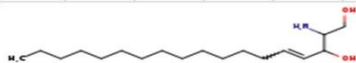

| Query | Liver Toxicity |           | Metabolism         |     |     |     |     |      | Membrane Transporters |            |           | Others     |     |      |             |       |
|-------|----------------|-----------|--------------------|-----|-----|-----|-----|------|-----------------------|------------|-----------|------------|-----|------|-------------|-------|
|       | DILI           | Cytotoxic | Cyp Inhibitors for |     |     |     |     |      | BBB                   | P-gp Inhib | P-gp Subs | hERG Block | MMP | AMES | MRTD (mg/c) |       |
|       |                |           | HLM                | 1A2 | 3A4 | 2D6 | 2C9 | 2C19 |                       |            |           |            |     |      |             |       |
| →     | No             | No        | Yes                | No  | No  | No  | No  | No   | Yes                   | No         | No        | No         | No  | No   | No          | 82167 |

### C MMS

(Canonical SMILES: CCCCCCCCCCCC1CCCC(C1)C2C(C(CO2)O)N)

| Query | Liver Toxicity |           | Metabolism         |     |     |     |     |      | Membrane Transporters |            |           | Others     |     |      |             |      |
|-------|----------------|-----------|--------------------|-----|-----|-----|-----|------|-----------------------|------------|-----------|------------|-----|------|-------------|------|
|       | DILI           | Cytotoxic | Cyp Inhibitors for |     |     |     |     |      | BBB                   | P-gp Inhib | P-gp Subs | hERG Block | MMP | AMES | MRTD (mg/c) |      |
|       |                |           | HLM                | 1A2 | 3A4 | 2D6 | 2C9 | 2C19 |                       |            |           |            |     |      |             |      |
| →     | No             | No        | Yes                | No  | No  | No  | No  | No   | Yes                   | No         | Yes       | No         | No  | No   | No          | 5128 |

**Figure S5.** Comparison of ADMET profile of Sphinganine, sphingosine and MMS shows distinct cytotoxicity prediction.

ADMET profile is generated using v-NN/ADMET server. (A) Sphinganine and (B) Sphingosine, (C) MMS

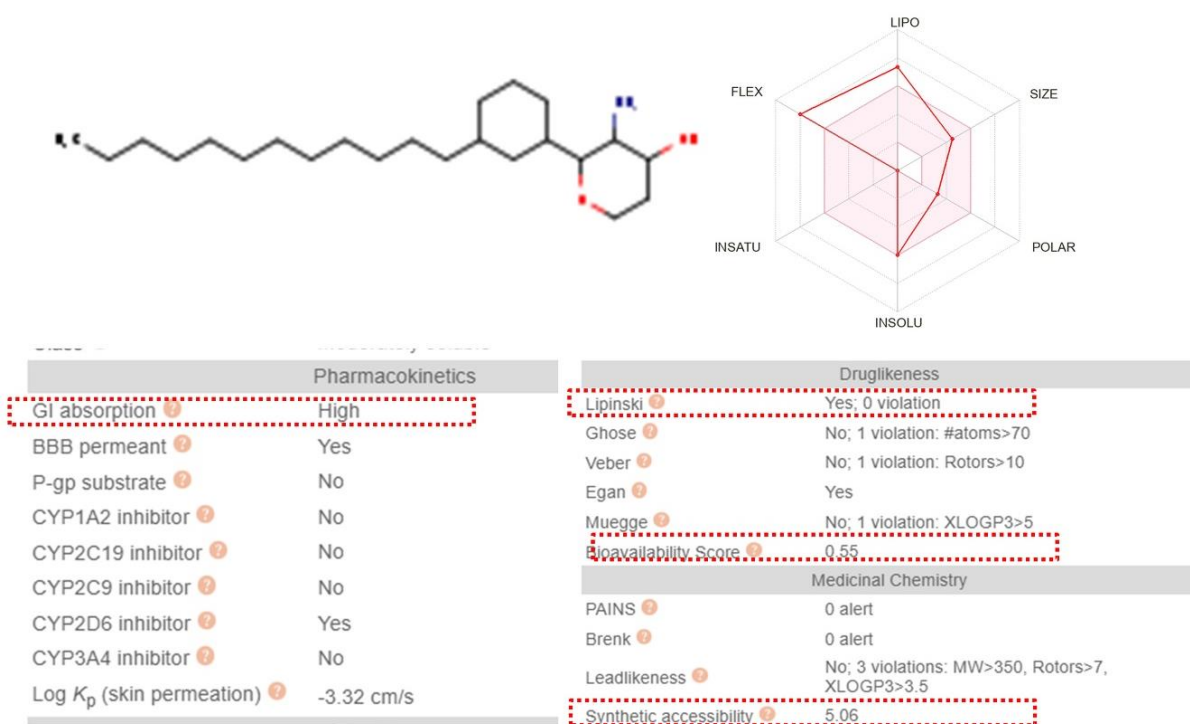

**Figure S6.** Pharmacokinetics, druglikeness and medicinal chemistry of modified mimetic sphinganine (MMS) shows favourable inhibitor candidate

ADME profile of MMS is generated by using SWISADME server.
